# Supplementary material for: A high-throughput targeted metabolomics method for the quantification of 104 non-polar metabolites in cholesterol, eicosanoid, and phospholipid metabolism: application in the study of a CCl4-induced liver injury mouse model
Source: Royal Society of Chemistry journal article supplement (doi:10.1039/d0an00385a), 2020-01-01
Supplement: d0an00385a6.pdf [file d0an00385a6.pdf]

### Supplemental Materials (Tables)

Table S1. Detailed information of target metabolites and ISs

| NO. | Analytes           | Formula  | CAS         | Common Name                                           |
|-----|--------------------|----------|-------------|-------------------------------------------------------|
| □   | □                  | □        | □           | □                                                     |
| 1   | dhkPGE2            | C20H32O5 | 363-23-5    | 13,14-dihydro-15-keto PGE2                            |
| 2   | dhkPGF2            | C20H34O5 | 27376-76-7  | 13,14-dihydro-15-keto Prostaglandin F2 $\alpha$       |
| 3   | dhkPGD2            | C20H32O5 | 59894-07-4  | 13,14-dihydro-15-keto Prostaglandin D2                |
| 4   | 15dPGD2            | C20H30O4 | 85235-11-6  | 15-deoxy- $\Delta$ 12,14-Prostaglandin D2             |
| 5   | 15kPGE2            | C20H30O5 | 26441-05-4  | 15-keto Prostaglandin E2                              |
| 6   | 15dPGJ2            | C20H28O3 | 87893-55-8  | 15-deoxy- $\Delta$ 12,14-Prostaglandin J2             |
| 7   | 20oh PGF2 $\alpha$ | C20H34O6 | 57930-92-4  | 20-hydroxy Prostaglandin F2 $\alpha$                  |
| 8   | 20oh PGE2          | C20H32O6 | 57930-95-7  | 20-hydroxy Prostaglandin E2                           |
| 9   | 19oh PGE2          | C20H32O6 | 64625-54-3  | 19(R)-hydroxy Prostaglandin E2                        |
| 10  | 12-OxoETE          | C20H30O3 | 108437-64-5 | 12-oxo-5Z,8Z,10E,14Z-eicosatetraenoic acid            |
| 11  | 12(S)-HETE         | C20H32O3 | 54397-83-0  | 12S-hydroxy-5Z,8Z,10E,14Z-eicosatetraenoic acid       |
| 12  | 11-HETE            | C20H32O3 | 73804-65-6  | 11-hydroxy-eicosatetraenoic acid                      |
| 13  | 11,12-EET          | C20H32O3 | 123931-40-8 | (12)-epoxy-5Z,8Z,14Z-eicosatrienoic acid              |
| 14  | 5-oxoETE           | C20H30O3 | 106154-18-1 | 5-oxo-6E,8Z,11Z,14Z-eicosatetraenoic acid             |
| 15  | 5(S)-HETE          | C20H32O3 | 70608-72-9  | 5S-hydroxy-6E,8Z,11Z,14Z-eicosatetraenoic acid        |
| 16  | LTB4               | C20H32O4 | 71160-24-2  | Leukotriene B4                                        |
| 17  | 6t LTB4            | C20H32O4 | 71652-82-9  | 6-trans Leukotriene B4                                |
| 18  | 12epi LTB4         | C20H32O4 | 83709-73-3  | 5S,12S-dihydroxy-6Z,8E,10E,14Z-eicosatetraenoic acid  |
| 19  | 6t,12epi LTB4      | C20H32O4 | 71548-19-1  | 5S,12S-dihydroxy-6E,8E,10E,14Z-eicosatetraenoic acid  |
| 20  | 12-oxoLTB4         | C20H30O4 | 136696-10-1 | 5S-hydroxy-12-oxo-6Z,8E,10E,14Z-eicosatetraenoic acid |

|    |                           |             |             |                                                          |
|----|---------------------------|-------------|-------------|----------------------------------------------------------|
| 21 | 20-HETE                   | C20H32O3    | 79551-86-3  | 20-hydroxy Arachidonic Acid                              |
| 22 | 12-HHT                    | C17H28O3    | 54397-84-1  | 12S-hydroxy-5Z,8E,10E-heptadecatrienoic acid             |
| 23 | LTD4                      | C25H40N2O6S | 73836-78-9  | Leukotriene D4                                           |
| 24 | 5(S),15(S)-DiHETE         | C20H32O4    | 82200-87-1  | 5S,15S-dihydroxy-6E,8Z,10Z,13E-eicosatetraenoic acid     |
| 25 | 15(S)-HETE                | C20H32O3    | 54845-95-3  | 15S-hydroxy-5Z,8Z,11Z,13E-eicosatetraenoic acid          |
| 26 | 20-hydroxy Leukotriene B4 | C20H32O5    | 79516-82-8  | 5S,12R,20-trihydroxy-6Z,8E,10E,14Z-eicosatetraenoic acid |
| 27 | 6k PGF1a                  | C20H34O6    | 58962-34-8  | 6-keto Prostaglandin F1 $\alpha$                         |
| 28 | TxB2                      | C20H34O6    | 54397-85-2  | Thromboxane B2                                           |
| 29 | PGF2a                     | C20H34O5    | 551-11-1    | Prostaglandin F2 $\alpha$                                |
| 30 | PGE2                      | C20H32O5    | 363-24-6    | Prostaglandin E2                                         |
| 31 | PGD2                      | C20H32O5    | 41598-07-6  | Prostaglandin D2                                         |
| 32 | 11 $\beta$ PGE2           | C20H32O5    | 38310-90-6  | 11-beta-Prostaglandin E2                                 |
| 33 | 13-HDoHE                  | C22H32O3    | 90780-53-3  | 13- hydroxy-docosahexaenoic acid                         |
| 34 | PGJ2                      | C20H30O4    | 60203-57-8  | Prostaglandin J2                                         |
| 35 | 5-iso PGF2a VI            | C20H34O5    | 180469-63-0 | Isoprostane F2 $\alpha$ -VI                              |
| 36 | LTE4                      | C23H37NO5S  | 75715-89-8  | Leukotriene E4                                           |
| 37 | 13-HOTrE                  | C18H30O3    | 87984-82-5  | 13-hydroxy-octadecatrienoic acid                         |
| 38 | 15-oxoETE                 | C20H30O3    | 81416-72-0  | 15-oxo-eicosatetraenoic acid                             |
| 39 | 12,13-EpOME               | C18H32O3    | none        | 12(13)-epoxy-octadecenoic acid                           |
| 40 | 9,10-diHOME               | C18H34O4    | 263399-34-4 | ( $\pm$ )9,10-dihydroxy-12Z-octadecenoic acid            |
| 41 | AA                        | C20H32O2    | 506-32-1    | Arachidonic acid                                         |
| 42 | Adrenic Acid              | C22H36O2    | 28874-58-0  | Adrenic acid                                             |
| 43 | EPA                       | C20H30O2    | 10417-94-4  | Eicosapentaenoic acid                                    |
| 44 | DHA                       | C22H32O2    | 6217-54-5   | Docosahexaenoic acid                                     |
| 45 | 14:0 PC (DMPC)            | C36H72NO8P  | 18194-24-6  | 1,2-dimyristoyl-sn-glycero-3-phosphocholine              |
| 46 | 16:0 PC (DPPC)            | C40H80NO8P  | 63-89-8     | 1,2-dipalmitoyl-sn-glycero-3-phosphocholine              |

|    |                |               |              |                                                                 |
|----|----------------|---------------|--------------|-----------------------------------------------------------------|
| 47 | 16:0-18:0 PC   | C42H84NO8P    | 59403-51-9   | 1-palmitoyl-2-stearoyl-sn-glycero-3-phosphocholine              |
| 48 | 16:0-18:1 PC   | C42H82NO8P    | 26853-31-6   | 1-palmitoyl-2-oleoyl-sn-glycero-3-phosphocholine                |
| 49 | 16:0-20:4 PC   | C44H80NO8P    | 35418-58-7   | 1-palmitoyl-2-arachidonoyl-sn-glycero-3-phosphocholine          |
| 50 | 18:0 PC (DSPC) | C44H88NO8P    | 816-94-4     | 1,2-distearoyl-sn-glycero-3-phosphocholine                      |
| 51 | 18:0-18:1 PC   | C44H86NO8P    | 56421-10-4   | 1-stearoyl-2-oleoyl-sn-glycero-3-phosphocholine                 |
| 52 | 18:0-22:6 PC   | C48H84NO8P    | 59403-52-0   | 1-stearoyl-2-docosahexaenoyl-sn-glycero-3-phosphocholine        |
| 53 | 20:0 PC        | C48H96NO8P    | 61596-53-0   | 1,2-diarachidoyl-sn-glycero-3-phosphocholine                    |
| 54 | 16:0 LPC       | C24H50NO7P    | 17364-16-8   | 1-palmitoyl-2-hydroxy-sn-glycero-3-phosphocholine               |
| 55 | 18:1 Lyso PC   | C26H52NO7P    | 19420-56-5   | 1-oleoyl-2-hydroxy-sn-glycero-3-phosphocholine                  |
| 56 | 18:0 Lyso PC   | C26H54NO7P    | 19420-57-6   | 1-stearoyl-2-hydroxy-sn-glycero-3-phosphocholine                |
| 57 | 20:0 LPC       | C28H58NO7P    | 108341-80-6  | 1-heptadecanoyl-2-hydroxy-sn-glycero-3-phosphocholine           |
| 58 | 16:0 PA        | C35H68NaO8P   | 169051-60-9  | 1,2-dipalmitoyl-sn-glycero-3-phosphate (sodium salt)            |
| 59 | 16:0-18:1 PA   | C37H70O8PNa   | 169437-35-8  | 1-palmitoyl-2-oleoyl-sn-glycero-3-phosphate (sodium salt)       |
| 60 | 16:0 Lyso PA   | C19H38O7PNa   | 17618-08-5   | 1-palmitoyl-2-hydroxy-sn-glycero-3-phosphate (sodium salt)      |
| 61 | 16:0 PS        | C38H73NO10PNa | 145849-32-7  | 1,2-dipalmitoyl-sn-glycero-3-phospho-L-serine (sodium salt)     |
| 62 | 18:0-18:1 PS   | C42H79NO10PNa | 321883-23-2  | 1-stearoyl-2-oleoyl-sn-glycero-3-phospho-L-serine (sodium salt) |
| 63 | 18:0 Lyso PS   | C24H47NPO9Na  | 1246298-16-7 | 1-stearoyl-2-hydroxy-sn-glycero-3-phospho-L-serine              |
| 64 | 16:0 PI        | C41H82NO13P   | 34290-57-8   | 1,2-dipalmitoyl-sn-glycero-3-phospho-(1'-myo-inositol)          |
| 65 | 18:0 PI        | C45H90NO13P   | 849412-67-5  | 1,2-distearoyl-sn-glycero-3-phosphoinositol                     |
| 66 | 16:0-18:1 PI   | C43H84NO13P   | 50730-13-7   | 1-palmitoyl-2-oleoyl-sn-glycero-3-phosphoinositol               |
| 67 | 18:0-20:4 PI   | C47H86NO13P   | 1331751-28-0 | 1-stearoyl-2-arachidonoyl-sn-glycero-3-phosphoinositol          |
| 68 | 18:0 Lyso PI   | C27H56NO12P   | 849412-49-3  | 1-stearoyl-2-hydroxy-sn-glycero-3-phosphoinositol               |
| 69 | 14:0 PG        | C34H66O10PNa  | 200880-40-6  | 1,2-dimyristoyl-sn-glycero-3-phospho-(1'-rac-glycerol)          |
| 70 | 16:0-18:1 PG   | C40H76O10PNa  | 268550-95-4  | 1-palmitoyl-2-oleoyl-sn-glycero-3-phospho-(1'-rac-glycerol)     |
| 71 | 18:0 PG        | C42H82O10PNa  | 200880-42-8  | 1,2-distearoyl-sn-glycero-3-phospho-(1'-rac-glycerol)           |
| 72 | 14:0 PE        | C33H66NO8P    | 998-07-2     | 1,2-dimyristoyl-sn-glycero-3-phosphoethanolamine                |

|    |              |             |             |                                                        |
|----|--------------|-------------|-------------|--------------------------------------------------------|
| 73 | 16:0 PE      | C37H74NO8P  | 923-61-5    | 1,2-dipalmitoyl-sn-glycero-3-phosphoethanolamine       |
| 74 | 18:0 PE      | C41H82NO8P  | 1069-79-0   | 1,2-distearoyl-sn-glycero-3-phosphoethanolamine        |
| 75 | 16:0 Lyso PE | C21H44NO7P  | 53862-35-4  | 1-palmitoyl-2-hydroxy-sn-glycero-3-phosphoethanolamine |
| 76 | 18:0 Lyso PE | C23H48NO7P  | 69747-55-3  | 1-Stearoyl-2-Hydroxy-sn-Glycero-3-Phosphoethanolamine  |
| 77 | Cho          | C27H46O     | 57-88-5     | Cholesterol                                            |
| 78 | 253Hy        | C27H45NaO5S | 884905-07-1 | 25-hydroxycholesterol-3-sulfate (sodium salt)          |
| 79 | 24EC         | C27H44O2    | 72542-49-5  | 24(S),25-EPOXYCHOLESTEROL                              |
| 80 | 22Hy         | C27H46O2    | 22348-64-7  | 22 $\beta$ -hydroxycholesterol                         |
| 81 | 27Hy         | C27H46O2    | 20380-11-4  | 27-hydroxycholesterol                                  |
| 82 | 25HY         | C27H46O2    | 2140-46-7   | 25-hydroxycholesterol                                  |
| 83 | CS           | C27H46O4S   | 1256-86-6   | cholesterol 3-sulfate                                  |
| 84 | 4bHY         | C27H46O2    | 17320-10-4  | 4-beta-hydroxycholesterol                              |
| 85 | 24sHY        | C27H46O2    | 474-73-7    | 24s-hydroxycholesterol                                 |
| 86 | 3bHY         | C27H44O2    | 566-28-9    | 3beta-hydroxy-5-cholesten-7-one(7-ketocholesterol)     |
| 87 | 7ahy         | C27H46O2    | 566-26-7    | 7alpha-hydroxycholesterol                              |
| 88 | 7bhy         | C27H46O2    | 566-27-8    | 7beta-hydroxycholesterol                               |
| 89 | 7ahc         | C27H44O2    | 3862-25-7   | 7alpha-hydroxy-4-cholesterol-3-one                     |
| 90 | GCDA         | C26H43NO5   | 640-79-9    | Glycoursodeoxycholic acid                              |
| 91 | TCDA         | C26H45NO6S  | 516-35-8    | Taurochenodesoxycholic acid                            |
| 92 | GCDCDA       | C26H43NO5   | 64480-66-6  | Chenodeoxycholic acid glycine conjugate                |
| 93 | GDCA         | C26H43NO5   | 360-65-6    | Deoxycholic acid glycine conjugate                     |
| 94 | DCA          | C24H40O4    | 83-44-3     | Desoxycholic acid                                      |
| 95 | GCA          | C26H43NO6   | 475-31-0    | Glycocholic acid                                       |
| 96 | TCA          | C26H45NO7S  | 81-24-3     | Taurocholic acid                                       |
| 97 | CDCA         | C24H40O4    | 474-25-9    | Chenodeoxycholic acid                                  |
| 98 | CA           | C24H40O5    | 81-25-4     | Cholic acid                                            |

|     |                       |              |              |                                                                        |
|-----|-----------------------|--------------|--------------|------------------------------------------------------------------------|
| 99  | LCA                   | C24H40O3     | 434-13-9     | Lithocholic acid                                                       |
| 100 | UDCA                  | C24H40O3     | 128-13-2     | Ursodeoxycholic acid                                                   |
| 101 | GLCA                  | C26H43NO4    | 474-74-8     | Lithocholic acid glycine conjugate                                     |
| 102 | TDCA                  | C26H45NO6S   | 207737-97-1  | Taurodeoxycholic acid                                                  |
| 103 | TLCA                  | C26H45NO5S   | 6042-32-6    | Taurolithocholic acid                                                  |
| 104 | TUDCA                 | C26H45NO6S   | 14605-22-2   | Tauroursodeoxycholic acid                                              |
| 105 | (d4) TXB2             | C20H30D4O6   | 1346112-79-5 | (d4) Thromboxane B2                                                    |
| 106 | (d4) PGD2             | C20H28D4O5   | 211105-29-2  | (d4) Prostaglandin D2                                                  |
| 107 | (d4) 15d PGJ2         | C20H24D4O3   | 1542166-82-4 | (d4) 15-deoxy-Prostaglandin J2                                         |
| 108 | (d4) LTB4             | C20H28D4O4   | 124629-74-9  | (d4) Leukotriene B4                                                    |
| 109 | (d4) 13-HODE          | C18H28D4O3   | 139408-39-2  | (d4) 13-hydroxy-octadecadienoic acid                                   |
| 110 | (d7) 5-oxoETE         | C20H23D7O3   | none         | (d7) 5-oxo-eicosatetraenoic acid                                       |
| 111 | (d11) 11,12 EET       | C20H21D11O3  | none         | (d11) 11(12)-epoxy-eicosatrienoic acid                                 |
| 112 | (d8) Arachidonic Acid | C20H24D8O2   | 69254-37-1   | (d8) Arachidonic acid                                                  |
| 113 | (d8) 5(s)-HETE        | C20H24D8O3   | 330796-62-8  | (d8)5S-hydroxy-6E,8Z,11Z,14Z-eicosatetraenoic acid                     |
| 114 | (d6) 20-HETE          | C20H26D6O3   | none         | (d6)20-hydroxy Arachidonic Acid                                        |
| 115 | (d8) 15(S)-HETE       | C20H24D8O3   | 54845-95-3   | (d8)15S-hydroxy-5Z,8Z,11Z,13E-eicosatetraenoic acid                    |
| 116 | 17:0 Lyso PC          | C25H52NO7P   | 50930-23-9   | 1-heptadecanoyl-2-hydroxy-sn-glycero-3-phosphocholine                  |
| 117 | 17:0 Lyso PA          | C20H40O7PNa  | 799268-66-9  | 1-heptadecanoyl-2-hydroxy-sn-glycero-3-phosphate                       |
| 118 | 17:1 Lyso PS          | C23H43NNaO9P | 1246298-15-6 | 1-(10Z-heptadecenoyl)-2-hydroxy-sn-glycero-3-[phospho-L-serine]        |
| 119 | 17:1 Lyso PI          | C26H52NO12P  | 1246353-39-8 | 1-(10Z-heptadecenoyl)-2-hydroxy-sn-glycero-3-phospho-(1'-myo-inositol) |
| 120 | 15:0 PG               | C36H70O10PNa | 322647-32-5  | 1,2-dipentadecanoyl-sn-glycero-3-phospho-(1'-rac-glycerol)             |
| 121 | 17:1 Lyso PE          | C22H44NO7P   | 1246298-09-8 | 1-(10Z-heptadecenoyl)-sn-glycero-3-phosphoethanolamine                 |
| 122 | (d7)7ahc              | C27H37D7O2   | 2260669-17-6 | (d7)7alpha-hydroxy-4-cholesterol-3-one                                 |
| 123 | (C13)GCA              | C25H43NO6C13 | none         | Glycocholic acid-C13                                                   |
