# Supplementary figures and images for: A high-throughput targeted metabolomics method for the quantification of 104 non-polar metabolites in cholesterol, eicosanoid, and phospholipid metabolism: application in the study of a CCl4-induced liver injury mouse model
Source: Royal Society of Chemistry journal article supplement (doi:10.1039/d0an00385a), 2020-01-01

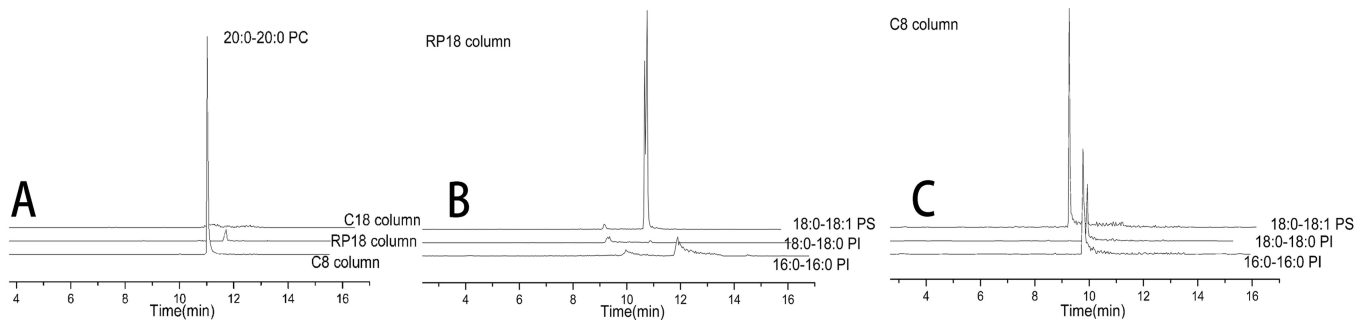

**D** 0.02% FA pH=3.75

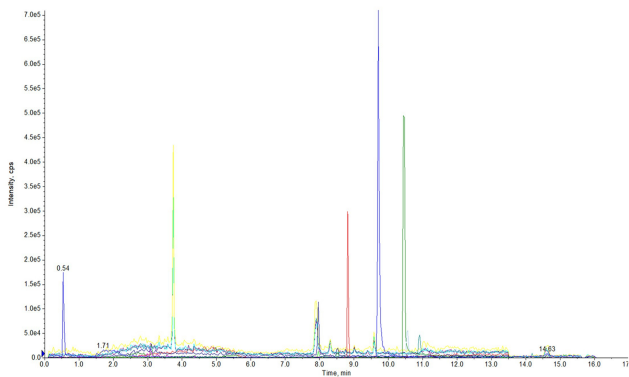

**E** 20 mM NH<sub>4</sub>COOH pH=6.36

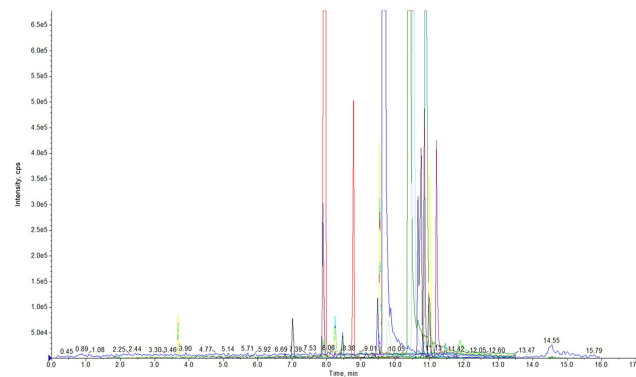

Supplement: d0an00385a2.pdf [file d0an00385a2.pdf]

**A**

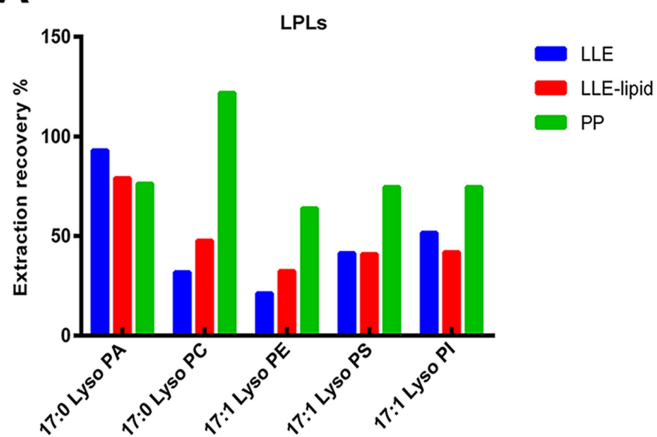

**B**

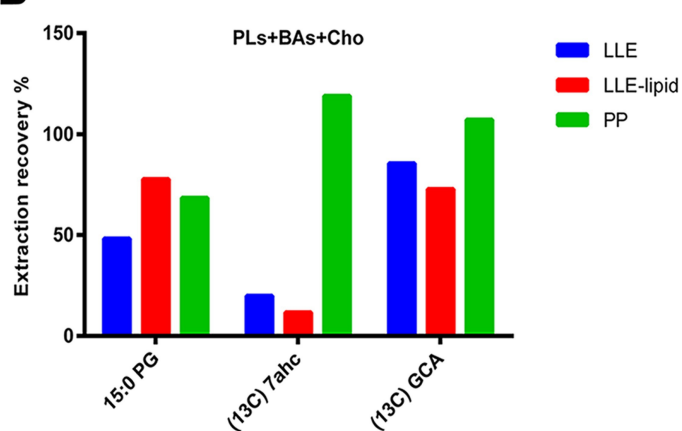

**C**

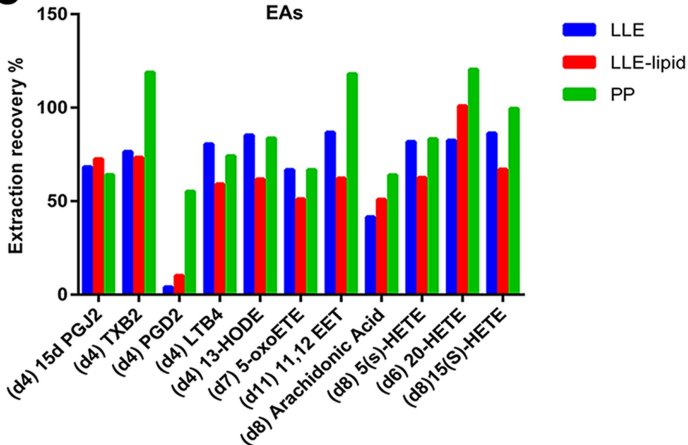

**D**

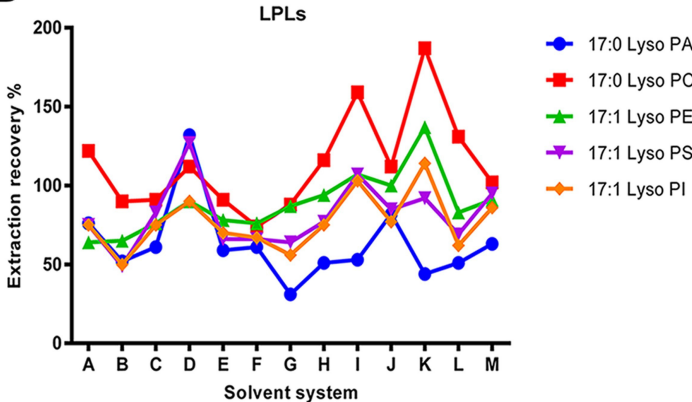

**E**

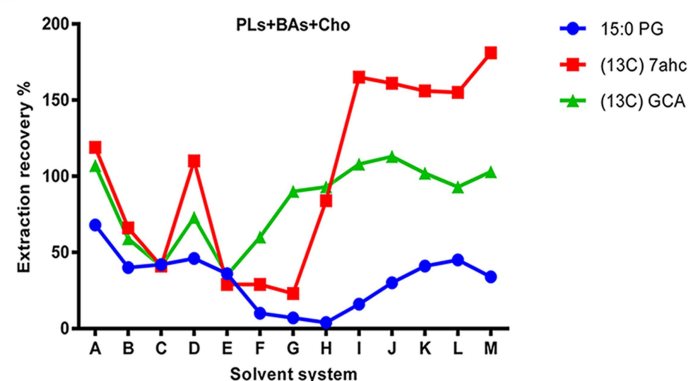

**F**

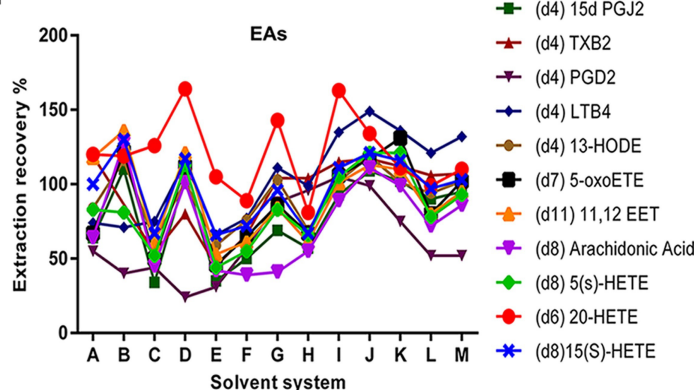

**G**

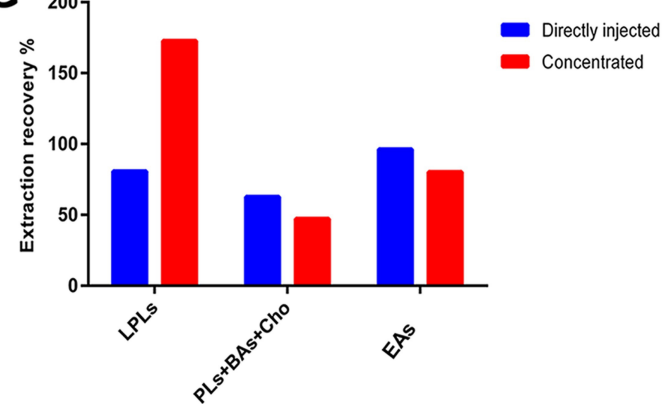

**H**

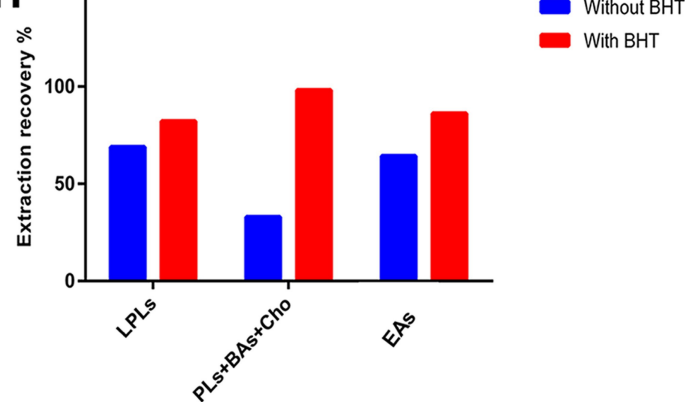

Supplement: d0an00385a3.pdf [file d0an00385a3.pdf]

**A**

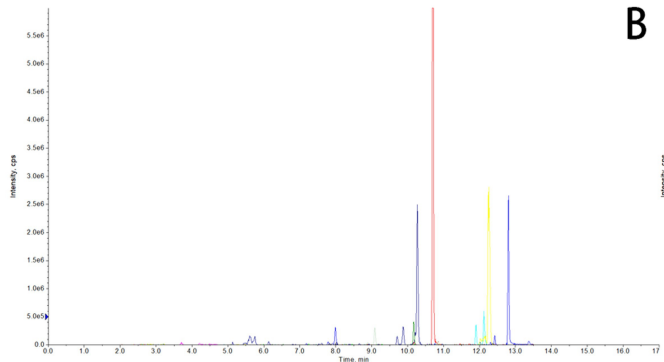

**B**

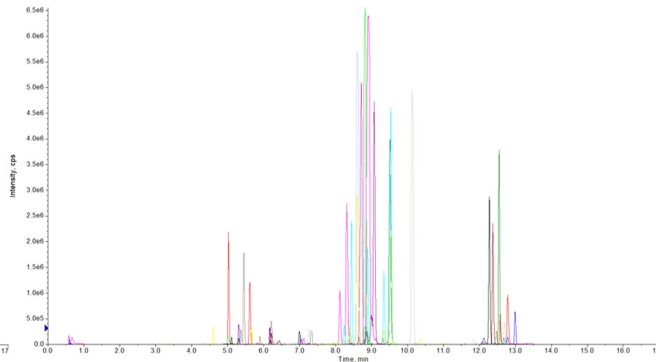

**C**

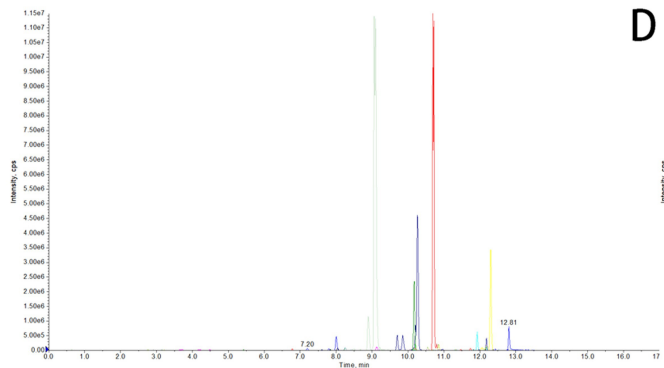

**D**

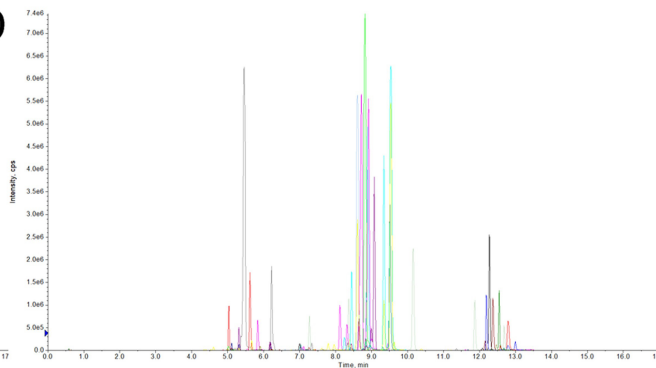

Supplement: d0an00385a4.pdf [file d0an00385a4.pdf]

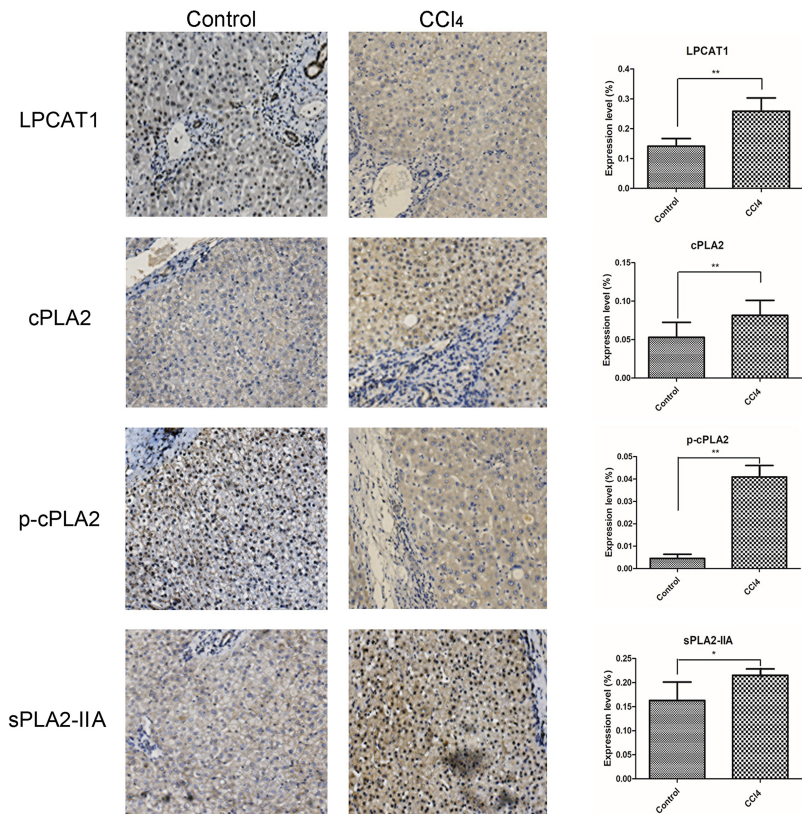

Supplement: d0an00385a5.pdf [file d0an00385a5.pdf]
